# Supplementary material
Source: Springer Nature journal article supplement (https://www.springermedizin.de/resource/supplementary/12884_2010_387_MOESM7_ESM.pdf/9457598)
Supplement: MOESM7 [file 9457598]

EXISTING LEVEL OF CARE & MAGNITUDE OF THE PROBLEM

### **Step I: Retrospective review: Gap analysis**

1. Identify areas of unmet need
2. Describe the pattern of the problem
3. Identify underlying factors for the gaps

### **Step II: Implementation**

1. Select required interventions: *what should be done?*
2. Set priorities for improvement: *what can be afforded?*
3. Plan for sustainability of the program and achievements: involve all stakeholders
4. Set order of implementation
5. Implement the set of interventions according to the agreed order

### **Step III: Monitoring and Evaluation**

1. Develop evaluation work plan
2. Determine regularly the implementation successes, constraints and recommend on the way forward.

EXPECTED LEVEL OF PREGNANCY CARE & OUTCOME
